# Supplementary material
Source: Springer Nature journal article supplement (https://www.springermedizin.de/resource/supplementary/13014_2012_815_MOESM1_ESM.pdf/9634750)
Supplement: MOESM1 [file 9634750]

## The 7th edition of the AJCC/UICC staging system of nasopharyngeal carcinoma

---

|                |                                                                                                                                                                                                               |
|----------------|---------------------------------------------------------------------------------------------------------------------------------------------------------------------------------------------------------------|
| <b>T1</b>      | Tumor confined to the nasopharynx, or extends to oropharynx and/or nasal cavity without parapharyngeal extension                                                                                              |
| <b>T2</b>      | Tumor with parapharyngeal extension                                                                                                                                                                           |
| <b>T3</b>      | Tumor involves bony structures of skull base and/or paranasal sinuses                                                                                                                                         |
| <b>T4</b>      | Tumor with intracranial extension and/or involvement of cranial nerves, hypopharynx, orbit, or with extension to the infratemporal fossa/masticator space                                                     |
| <b>N0</b>      | No regional lymph node metastasis                                                                                                                                                                             |
| <b>N1</b>      | Unilateral metastasis in lymph node(s), 6 cm or less in greatest dimension, above the supraclavicular fossa, and/or unilateral or bilateral, retropharyngeal lymph nodes, 6 cm or less, in greatest dimension |
| <b>N2</b>      | Bilateral metastasis in lymph node(s), 6 cm or less in greatest dimension, above the supraclavicular fossa                                                                                                    |
| <b>N3</b>      | Metastasis in a lymph node(s) >6 cm and/or extension to supraclavicular fossa                                                                                                                                 |
| <b>N3a</b>     | Greater than 6 cm in dimension                                                                                                                                                                                |
| <b>N3b</b>     | Extension to the supraclavicular fossa                                                                                                                                                                        |
| <b>M0</b>      | No distant metastases                                                                                                                                                                                         |
| <b>M1</b>      | Distant metastases Present                                                                                                                                                                                    |
| <b>Stage I</b> | T1N0M0                                                                                                                                                                                                        |

**Stage II** T2N0-1M0 to T1-2N1M0

**Stage III** T3N0-2M0 to T1-3N2M0

**Stage IVA** T4N0-2M0

**Stage IVB** Any T N3 M0

**Stage IVC** Any T Any N M1

---
